# Supplementary material for: An integrated gene-to-outcome multimodal database for metabolic dysfunction-associated steatotic liver disease
Source: PubMed Central journal article supplement (PMC10667096; doi:10.1038/s41591-023-02602-2), 2023-10-30
Supplement: 41591_2023_2602_MOESM1_ESM.pdf [file 41591_2023_2602_MOESM1_ESM.pdf]

---

# **An integrated gene-to-outcome multimodal database for metabolic dysfunction-associated steatotic liver disease**

---

In the format provided by the authors and unedited

---

Supplementary Table 1

| <b>Description(s)</b>                                                                                      | <b>Code(s) - ICD, OPCS, BNF</b>                                                                                                              |
|------------------------------------------------------------------------------------------------------------|----------------------------------------------------------------------------------------------------------------------------------------------|
| <i>ICD09/ICD10 disease and health related problems; any applied as diagnosis or procedure and the date</i> |                                                                                                                                              |
| Type 2 diabetes                                                                                            | 250.00 (9) E11.9 (10)                                                                                                                        |
| Hypertension, hypertensive heart disease, hypertensive kidney disease                                      | 401.0, 401.1, 401.9 402.01 402.11 402.91 402.00 402.10 402.90 403.00 403.01 403.10 403.11 403.90 403.91 (9) I10 I11.0 I11.9 I12.0 I12.9 (10) |
| Ischaemic Heart disease (acute, chronic)                                                                   | 411.89 414.8 414.9 (9) I24.9 I25.9 (10)                                                                                                      |
| Angina                                                                                                     | 411.1 413.9 (9) I20.0 I20.09 (10)                                                                                                            |
| MI                                                                                                         | 410 414.2 (9) I21.9 I25.82 (10)                                                                                                              |
| Dyslipidaemia/hypercholesterolaemia                                                                        | 272.2 272.0 (9) E78.5 E78.00 E78.01 (10)                                                                                                     |
| Chronic Kidney disease                                                                                     | 585.9 (9) N18.9 (10)                                                                                                                         |
| Ascites                                                                                                    | 789.5 (9) R18.8 (10)                                                                                                                         |
| encephalopathy                                                                                             | 348.30 (9) G93.40 (10)                                                                                                                       |
| hepatocellular carcinoma                                                                                   | 155.0 (9) c22.0 (10)                                                                                                                         |
| NAFLD diagnosis                                                                                            | 571.8 (9) K75.81, K76.0 (10)                                                                                                                 |
| Obesity                                                                                                    | 278.00 (9) E66.9 (10)                                                                                                                        |
| Cirrhosis                                                                                                  | 571.5 (9) K74.60 (10)                                                                                                                        |
| Diabetic nephropathy                                                                                       | 250.40 (9) E11.29 (10)                                                                                                                       |
| Intermittent claudication                                                                                  | 443.9 (9) I70.213 (10)                                                                                                                       |
| Varices (bleeding, without bleeding)                                                                       | 456.1, 456.0 (9) I85.00, I85.01 (10)                                                                                                         |
| Hepatic encephalopathy                                                                                     | 572.2 (9) K72.90 (10)                                                                                                                        |
| Spontaneous bacterial peritonitis                                                                          | 567.23 (9) K65.2 (10)                                                                                                                        |
| Hepatorenal syndrome                                                                                       | 572.4 (9) k76.7 (10)                                                                                                                         |
| Hepatic failure                                                                                            | 572.2/572.4/573.3/573.8/572.8 (9) K72.90 (10)                                                                                                |

| <b>Description(s)</b>                                   | <b>Code(s) - ICD, OPCS, BNF</b> |
|---------------------------------------------------------|---------------------------------|
| NASH                                                    | 571.8 (9) k75.81 (10)           |
| Fatty (change of) liver, not elsewhere classified       | K76.0                           |
| Liver disease, unspecified                              | 573.9 (9) k76.9 (10)            |
| Hepatitis fibrosis                                      | 571.5 (9) k74.0 (10)            |
| Hepatic sclerosis                                       | 571.5 (9) k74.1 (10)            |
| Hepatic fibrosis with hepatic sclerosis                 | 571.5 (9) k74.2 (10)            |
| Aany other unspecified cirrhosis of the liver           | 571.5 (9) k74.6 (10)            |
| Hepatomegaly not elsewhere classified                   | 789.1 (9) R16.0 (10)            |
| Splenomegaly not elsewher classified                    | 789.2 (9) R16.1 (10)            |
| Hepatomegaly with splenomegaly not elsewhere classified | R16.2 (10)                      |
| Haematemesis                                            | 578.0 (9) K92.0 (10)            |
| Melaena                                                 | 777.3 (9) K92.1 (10)            |
| Gastrointestinal haemorrhage, unspecified               | 578.9 (9) K92.2 (10)            |
| Portal hypertension                                     | 572.3 (9) k76.6 (10)            |
| Hepatopulmonary syndrome                                | 573.5 (9) k76.81 (10)           |
| Acute kidney injury                                     | 584.9 (9) N17.9 (10)            |
| Hepatocellular carcinoma                                | 155.0 (9) C22.0 (10)            |
| Cholangiocarcinoma                                      | 155.1 (9) C22.1 (10)            |
| Malignant neoplasms of digestive organs                 | C15-C26 (10)                    |
| Malignant neoplasms of female genital organs            | C51-C58 (10)                    |

| <b>Description(s)</b>                                                                               | <b>Code(s) - ICD, OPCS, BNF</b> |
|-----------------------------------------------------------------------------------------------------|---------------------------------|
| Obstructive sleep apnoea                                                                            | 327.23 (9) G47.33 (10)          |
| <i>Blood_Biochemistry (SCI_store): all per patient, over the range provided with specific dates</i> |                                 |
| Alanine aminotransferase (ALT)                                                                      | NA                              |
| Aspartate aminotransferase (AST)                                                                    | NA                              |
| Bilirubin                                                                                           | NA                              |
| Alkaline phosphatase (ALP)                                                                          | NA                              |
| Gamma-glutamyl transpeptidase (GGT)                                                                 | NA                              |
| Sodium                                                                                              | NA                              |
| Potassium                                                                                           | NA                              |
| Urea                                                                                                | NA                              |
| Creatinine                                                                                          | NA                              |
| Estimated Glomerular Filtration Rate (eGFR)                                                         | NA                              |
| Albumin                                                                                             | NA                              |
| Lipids (are these covered by Triglycerides, HDL, LDL, VLDL?)                                        | NA                              |
| Triglycerides                                                                                       | NA                              |
| HDL                                                                                                 | NA                              |
| LDL                                                                                                 | NA                              |
| Glucose                                                                                             | NA                              |
| HbA1C                                                                                               | NA                              |
| Haemoglobin                                                                                         | NA                              |
| Platelets                                                                                           | NA                              |
| Neutrophils 10 <sup>9</sup> /L                                                                      | NA                              |

| <b>Description(s)</b>             | <b>Code(s) - ICD, OPCS, BNF</b> |
|-----------------------------------|---------------------------------|
| Lymphocytes 10 <sup>9</sup> /L    | NA                              |
| Neutrophil:lymphocyte ratio (NLR) | NA                              |
| Hyaluronic acid                   | NA                              |
| Prothrombin time and INR          | NA                              |
| HOMA-IR                           | NA                              |

*OPCS\_04 Interventions; when these codes from TRAK used with specific dates*

|                                                                                                    |                                                                                                                                       |
|----------------------------------------------------------------------------------------------------|---------------------------------------------------------------------------------------------------------------------------------------|
| Imaging scans                                                                                      | U01, U08, U10, U11, U16, U17, U19, U20, U21, U36                                                                                      |
| Liver procedures (biopsy, locoregional HCC treatments, TIPSS, liver resection and transplants etc) | J01, J02, J03, J06, J10, J11, J12, J13, J14, J15, J17, J72                                                                            |
| Endoscopy procedures                                                                               | G10, GG14, G15, G16, G42, G43, G44, G45, G46, G47, H52                                                                                |
| Paracentesis                                                                                       | T46                                                                                                                                   |
| Cardiovascular procedures                                                                          | K40, K41, K42, K43, K44, K45, K46, K47, K48, K49, K50, K51, K60, K61, K63, K65, K72, K75, L29, L31, L59, L63, L66, L68, L71, K74, K76 |
| renal transplant                                                                                   | M01                                                                                                                                   |
| compensation for renal failure                                                                     | X40, X41, X42                                                                                                                         |
| compensation for liver failure                                                                     | X43                                                                                                                                   |
| Fibroscan                                                                                          | manual data collection                                                                                                                |

*Medications: Name of medication from BNF with the dates prescribed*

|                                                                                         |               |
|-----------------------------------------------------------------------------------------|---------------|
| PPIs; H2-receptor antagonists, laxatives                                                | 1.1, 1.3, 1.6 |
| all cardiovascular drugs: anti-hypertensives; diuretics; lipid lowering; anticoagulants | 2             |
| anti-obesity drugs                                                                      | 4.5           |
| antibiotics; antibacterial                                                              | 5             |

| Description(s)                                                                                                                                         | Code(s) - ICD, OPCS, BNF                               |
|--------------------------------------------------------------------------------------------------------------------------------------------------------|--------------------------------------------------------|
| Treatment for diabetes - anti-diabetic drugs, insulin                                                                                                  | 6.1                                                    |
| Chemotherapy; Immunosuppressants incl corticosteroids                                                                                                  | 8                                                      |
| Vitamins                                                                                                                                               | 9.6                                                    |
| <i>SMR-06: Cancer; additional requirements when any of the ICD-O codes with C22 (ICD-10 site): Tumour site and type codes, and ENCR incidence date</i> |                                                        |
| ICD-O-2:                                                                                                                                               | 8170/3, 8180/3, 8160/3, 8162/3                         |
| ICD-O-3                                                                                                                                                | 8170/3, 8173/3, 8174/3, 8175/3, 8180/3, 8160/3, 8162/3 |

Supplementary Table 2

| Variable                                                                    | NASH-CRN fibrosis stage |                   |                    |                     |                     |
|-----------------------------------------------------------------------------|-------------------------|-------------------|--------------------|---------------------|---------------------|
|                                                                             | 0                       | 1                 | 2                  | 3                   | 4                   |
| <i>Liver test, per case temporal range, median days (IQR)</i>               |                         |                   |                    |                     |                     |
| ALT                                                                         | 2830 (2320)             | 2759 (2542.5)     | 3051 (2793.5)      | 2984 (3065.75)      | 2379 (2456.75)      |
| AST                                                                         | 1251 (2172)             | 1316.5 (2540)     | 1441<br>(1604.75)  | 1522 (2484)         | 856.5 (2134)        |
| ALP                                                                         | 2958<br>(2331.5)        | 2898<br>(2691.75) | 3168 (2820.5)      | 3143 (3146.75)      | 2580 (2701.5)       |
| Bilirubin                                                                   | 2960 (2477)             | 2780.5 (2696)     | 3380<br>(3100.25)  | 3096 (3641.75)      | 2444 (2560)         |
| INR                                                                         | 569<br>(1969.25)        | 827 (2380)        | 816.5 (2344)       | 1291.5<br>(2442.75) | 1619.5<br>(2152.25) |
| Prothrombin time                                                            | 888 (2253)              | 1221 (2542.5)     | 942.5<br>(2543.75) | 1501.5<br>(2596.75) | 1921 (2252.75)      |
| <i>Other laboratory results, per case temporal range, median days (IQR)</i> |                         |                   |                    |                     |                     |
| Creatinine                                                                  | 2760.5<br>(2146)        | 2417 (2598)       | 2670 (2630.5)      | 2791 (2437)         | 2314 (2671)         |
| Albumin                                                                     | 2297<br>(2723.5)        | 2404 (2992.5)     | 2662 (2745)        | 2772 (3239.5)       | 2301 (2640.75)      |
| Platelets                                                                   | 2913 (2332)             | 2934 (2684)       | 3339 (2627.5)      | 3143 (2998)         | 2681.5<br>(2648.25) |

Supplementary Table 3

|                                        | <b>Number of cases (%)</b> |
|----------------------------------------|----------------------------|
| <i>Biopsy cases</i>                    |                            |
| Diagnosis (deranged LFTs)              | 428 (45.5)                 |
| Staging/diagnosis (deranged LFTs)      | 197 (21)                   |
| Unknown                                | 18 (1.9)                   |
| Staging                                | 16 (1.7)                   |
| <i>Resection cases</i>                 |                            |
| Colorectal carcinoma metastasis        | 150 (16)                   |
| Hepatocellular carcinoma               | 38 (4)                     |
| Benign, not otherwise specified        | 12 (1.3)                   |
| Hepatic adenoma                        | 6 (0.6)                    |
| Focal nodular hyperplasia              | 5 (0.5)                    |
| Biliary tract carcinoma                | 4 (0.4)                    |
| neuroendocrine tumour                  | 4 (0.4)                    |
| Non colorectal metastasis              | 2 (0.2)                    |
| Unknown                                | 1 (0.1)                    |
| Bile duct adenoma                      | 1 (0.1)                    |
| Completion excision of gallbladder bed | 1 (0.1)                    |
| Mucinous cystic neoplasm               | 1 (0.1)                    |



Supplementary Table 4

| <b>Histological feature</b>    | <b>Light's kappa</b> | <b>Intraclass correlation coefficient</b> | <b>Krippendorff's alpha</b> | <b>Kendall's W</b> |
|--------------------------------|----------------------|-------------------------------------------|-----------------------------|--------------------|
| NAS ballooning                 | 0.620                | 0.627                                     | 0.621                       | 0.754              |
| SAF ballooning                 | 0.374                | 0.392                                     | 0.334                       | 0.592              |
| NAS inflammation               | 0.251                | 0.303                                     | 0.176                       | 0.549              |
| SAF inflammation               | 0.131                | 0.165                                     | 0.107                       | 0.466              |
| NAS/SAF steatosis              | 0.826                | 0.830                                     | 0.823                       | 0.887              |
| Modified Ishak fibrosis stage  | 0.954                | 0.958                                     | 0.945                       | 0.967              |
| NASH-CRN fibrosis stage        | 0.923                | 0.934                                     | 0.912                       | 0.947              |
| Histological diagnosis of NASH | 0.416                | NA                                        | 0.408                       | NA                 |

Supplementary Table 5

| All-cause mortality                                                                                                                                                                                                    |             |                           |                           |
|------------------------------------------------------------------------------------------------------------------------------------------------------------------------------------------------------------------------|-------------|---------------------------|---------------------------|
|                                                                                                                                                                                                                        |             | all HR (univariable)      | HR (multivariable)        |
| <i>Age at biopsy</i>                                                                                                                                                                                                   |             |                           |                           |
| Mean (SD)                                                                                                                                                                                                              | 52.1 (13.5) | 1.08 (1.06-1.10, p<0.001) | 1.07 (1.05-1.10, p<0.001) |
| <i>Gender, number (%)</i>                                                                                                                                                                                              |             |                           |                           |
| F                                                                                                                                                                                                                      | 312 (47.3)  | -                         | -                         |
| M                                                                                                                                                                                                                      | 347 (52.7)  | 0.60 (0.41-0.87, p=0.008) | 1.11 (0.74-1.65, p=0.617) |
| <i>NASH-CRN fibrosis stage, number (%)</i>                                                                                                                                                                             |             |                           |                           |
| 0                                                                                                                                                                                                                      | 198 (30.0)  | -                         | -                         |
| 1                                                                                                                                                                                                                      | 150 (22.8)  | 0.92 (0.48-1.79, p=0.816) | 0.85 (0.44-1.66, p=0.634) |
| 2                                                                                                                                                                                                                      | 100 (15.2)  | 1.69 (0.89-3.19, p=0.108) | 1.07 (0.56-2.06, p=0.837) |
| 3                                                                                                                                                                                                                      | 115 (17.5)  | 2.54 (1.42-4.53, p=0.002) | 1.78 (0.99-3.21, p=0.056) |
| 4                                                                                                                                                                                                                      | 96 (14.6)   | 5.32 (3.12-9.09, p<0.001) | 2.79 (1.60-4.87, p<0.001) |
| Number in dataframe = 659, Number in model = 659, Missing = 0, Number of events = 112, Concordance = 0.782 (SE = 0.020), R-squared = 0.146 (Max possible = 0.854), Likelihood ratio test = 103.888 (df = 6, p = 0.000) |             |                           |                           |

Supplementary Table 6

| Biopsy cases for all-cause mortality modelling |                            |        |                |                                                               |                                |                           |
|------------------------------------------------|----------------------------|--------|----------------|---------------------------------------------------------------|--------------------------------|---------------------------|
| NASH-CRN fibrosis stage                        | Status (0, alive; 1, dead) | Gender | RNAseq success | Post-biopsy period to death/censoring (median days $\pm$ IQR) | Age at biopsy (years $\pm$ SD) | Number of cases (percent) |
| 0                                              | 0                          | F      | No             | 3969 $\pm$ 3641.25                                            | 48.64 $\pm$ 13.52              | 14 (2.12)                 |
| 0                                              | 0                          | F      | Yes            | 2586 $\pm$ 3111                                               | 51.61 $\pm$ 12.21              | 61 (9.26)                 |
| 0                                              | 0                          | M      | No             | 2968 $\pm$ 3497.25                                            | 38.23 $\pm$ 11.36              | 22 (3.34)                 |
| 0                                              | 0                          | M      | Yes            | 2495 $\pm$ 2859                                               | 43.68 $\pm$ 12.08              | 77 (11.68)                |
| 0                                              | 1                          | F      | No             | 130 $\pm$ 96.5                                                | 67 $\pm$ 4.36                  | 3 (0.46)                  |
| 0                                              | 1                          | F      | Yes            | 2319.5 $\pm$ 4307.75                                          | 57.4 $\pm$ 10.43               | 10 (1.52)                 |
| 0                                              | 1                          | M      | No             | 3843 $\pm$ 3826                                               | 54.8 $\pm$ 19.49               | 5 (0.76)                  |
| 0                                              | 1                          | M      | Yes            | 1987.5 $\pm$ 1993.5                                           | 62 $\pm$ 10.79                 | 6 (0.91)                  |
| 1                                              | 0                          | F      | No             | 2940.5 $\pm$ 1320.75                                          | 55.61 $\pm$ 10.67              | 18 (2.73)                 |
| 1                                              | 0                          | F      | Yes            | 1556 $\pm$ 1522.75                                            | 52.04 $\pm$ 12.35              | 28 (4.25)                 |
| 1                                              | 0                          | M      | No             | 2617 $\pm$ 1944.75                                            | 40.12 $\pm$ 15.53              | 16 (2.43)                 |
| 1                                              | 0                          | M      | Yes            | 2379 $\pm$ 2869                                               | 46.6 $\pm$ 12.87               | 73 (11.08)                |
| 1                                              | 1                          | F      | No             | 2532 $\pm$ 0                                                  | 59 $\pm$ NA                    | 1 (0.15)                  |
| 1                                              | 1                          | F      | Yes            | 1686 $\pm$ 2919                                               | 61.7 $\pm$ 8.43                | 10 (1.52)                 |
| 1                                              | 1                          | M      | Yes            | 4465 $\pm$ 2358.75                                            | 52 $\pm$ 14.17                 | 4 (0.61)                  |

Biopsy cases for all-cause mortality modelling

| <b>NASH-CRN fibrosis stage</b> | <b>Status (0, alive; 1, dead)</b> | <b>Gender</b> | <b>RNAseq success</b> | <b>Post-biopsy period to death/censoring (median days <math>\pm</math> IQR)</b> | <b>Age at biopsy (years <math>\pm</math> SD)</b> | <b>Number of cases (percent)</b> |
|--------------------------------|-----------------------------------|---------------|-----------------------|---------------------------------------------------------------------------------|--------------------------------------------------|----------------------------------|
| 2                              | 0                                 | F             | No                    | 2734.5 $\pm$ 1019.5                                                             | 67.5 $\pm$ 12.02                                 | 2 (0.3)                          |
| 2                              | 0                                 | F             | Yes                   | 2417 $\pm$ 3130                                                                 | 54.83 $\pm$ 12.11                                | 29 (4.4)                         |
| 2                              | 0                                 | M             | No                    | 3570 $\pm$ 1358.25                                                              | 44 $\pm$ 10.35                                   | 10 (1.52)                        |
| 2                              | 0                                 | M             | Yes                   | 1889 $\pm$ 1645.5                                                               | 49.84 $\pm$ 14.16                                | 43 (6.53)                        |
| 2                              | 1                                 | F             | No                    | 3048.5 $\pm$ 2208.5                                                             | 62 $\pm$ 1.41                                    | 2 (0.3)                          |
| 2                              | 1                                 | F             | Yes                   | 647.5 $\pm$ 3021.75                                                             | 68.12 $\pm$ 11.29                                | 8 (1.21)                         |
| 2                              | 1                                 | M             | Yes                   | 1511 $\pm$ 394.5                                                                | 60.33 $\pm$ 9.42                                 | 6 (0.91)                         |
| 3                              | 0                                 | F             | No                    | 3316 $\pm$ 3348.75                                                              | 53.38 $\pm$ 10.72                                | 8 (1.21)                         |
| 3                              | 0                                 | F             | Yes                   | 1766 $\pm$ 1611                                                                 | 56.55 $\pm$ 12.13                                | 49 (7.44)                        |
| 3                              | 0                                 | M             | No                    | 3639 $\pm$ 1098                                                                 | 48.4 $\pm$ 14.17                                 | 5 (0.76)                         |
| 3                              | 0                                 | M             | Yes                   | 1660 $\pm$ 1326                                                                 | 55.13 $\pm$ 10.67                                | 30 (4.55)                        |
| 3                              | 1                                 | F             | No                    | 2142 $\pm$ 2517.5                                                               | 55.67 $\pm$ 10.21                                | 3 (0.46)                         |
| 3                              | 1                                 | F             | Yes                   | 2293.5 $\pm$ 2033                                                               | 62.2 $\pm$ 10.36                                 | 10 (1.52)                        |
| 3                              | 1                                 | M             | No                    | 100 $\pm$ 0                                                                     | 72 $\pm$ NA                                      | 1 (0.15)                         |
| 3                              | 1                                 | M             | Yes                   | 2341 $\pm$ 1680                                                                 | 59.44 $\pm$ 14.48                                | 9 (1.37)                         |

Biopsy cases for all-cause mortality modelling

| <b>NASH-CRN fibrosis stage</b> | <b>Status (0, alive; 1, dead)</b> | <b>Gender</b> | <b>RNAseq success</b> | <b>Post-biopsy period to death/censoring (median days <math>\pm</math> IQR)</b> | <b>Age at biopsy (years <math>\pm</math> SD)</b> | <b>Number of cases (percent)</b> |
|--------------------------------|-----------------------------------|---------------|-----------------------|---------------------------------------------------------------------------------|--------------------------------------------------|----------------------------------|
| 4                              | 0                                 | F             | No                    | 2142.5 $\pm$ 760.5                                                              | 59 $\pm$ 10.1                                    | 4 (0.61)                         |
| 4                              | 0                                 | F             | Yes                   | 1934 $\pm$ 1370                                                                 | 60.39 $\pm$ 11.26                                | 33 (5.01)                        |
| 4                              | 0                                 | M             | No                    | 2556 $\pm$ 972.5                                                                | 59.67 $\pm$ 10.12                                | 3 (0.46)                         |
| 4                              | 0                                 | M             | Yes                   | 1146.5 $\pm$ 1500.25                                                            | 52.27 $\pm$ 10.43                                | 22 (3.34)                        |
| 4                              | 1                                 | F             | No                    | 1845 $\pm$ 1082                                                                 | 60.83 $\pm$ 10.23                                | 6 (0.91)                         |
| 4                              | 1                                 | F             | Yes                   | 861 $\pm$ 1945                                                                  | 63.15 $\pm$ 7.5                                  | 13 (1.97)                        |
| 4                              | 1                                 | M             | No                    | 1774.5 $\pm$ 1755.75                                                            | 61.25 $\pm$ 5.44                                 | 4 (0.61)                         |
| 4                              | 1                                 | M             | Yes                   | 1113 $\pm$ 1104                                                                 | 59 $\pm$ 10.94                                   | 11 (1.67)                        |

Supplementary Table 7

| All-cause mortality, NAS scoring                                                                                                                                                                                       |            |                           |                            |
|------------------------------------------------------------------------------------------------------------------------------------------------------------------------------------------------------------------------|------------|---------------------------|----------------------------|
|                                                                                                                                                                                                                        | <b>all</b> | <b>HR (univariable)</b>   | <b>HR (multivariable)</b>  |
| <i>NASH-CRN fibrosis, number (%)</i>                                                                                                                                                                                   |            |                           |                            |
| 0                                                                                                                                                                                                                      | 198 (30.0) | -                         | -                          |
| 1                                                                                                                                                                                                                      | 150 (22.8) | 0.92 (0.48-1.79, p=0.816) | 1.10 (0.56-2.16, p=0.783)  |
| 2                                                                                                                                                                                                                      | 100 (15.2) | 1.69 (0.89-3.19, p=0.108) | 1.89 (0.95-3.74, p=0.069)  |
| 3                                                                                                                                                                                                                      | 115 (17.5) | 2.54 (1.42-4.53, p=0.002) | 3.20 (1.64-6.24, p=0.001)  |
| 4                                                                                                                                                                                                                      | 96 (14.6)  | 5.32 (3.12-9.09, p<0.001) | 5.65 (3.12-10.24, p<0.001) |
| <i>NAS lobular inflammation, number (%)</i>                                                                                                                                                                            |            |                           |                            |
| 0                                                                                                                                                                                                                      | 94 (14.3)  | -                         | -                          |
| 1                                                                                                                                                                                                                      | 305 (46.3) | 1.14 (0.67-1.94, p=0.623) | 0.96 (0.52-1.76, p=0.896)  |
| 2                                                                                                                                                                                                                      | 220 (33.4) | 1.27 (0.72-2.25, p=0.412) | 1.03 (0.49-2.16, p=0.941)  |
| 3                                                                                                                                                                                                                      | 40 (6.1)   | 1.45 (0.57-3.68, p=0.434) | 1.36 (0.47-3.94, p=0.569)  |
| <i>NAS steatosis, number (%)</i>                                                                                                                                                                                       |            |                           |                            |
| 0                                                                                                                                                                                                                      | 22 (3.3)   | -                         | -                          |
| 1                                                                                                                                                                                                                      | 242 (36.7) | 0.90 (0.39-2.10, p=0.808) | 1.12 (0.44-2.83, p=0.812)  |
| 2                                                                                                                                                                                                                      | 245 (37.2) | 0.67 (0.28-1.58, p=0.362) | 0.83 (0.31-2.26, p=0.721)  |
| 3                                                                                                                                                                                                                      | 150 (22.8) | 0.37 (0.14-0.96, p=0.040) | 0.47 (0.16-1.38, p=0.169)  |
| <i>NAS hepatocyte ballooning, number (%)</i>                                                                                                                                                                           |            |                           |                            |
| 0                                                                                                                                                                                                                      | 248 (37.6) | -                         | -                          |
| 1                                                                                                                                                                                                                      | 218 (33.1) | 1.23 (0.79-1.91, p=0.358) | 1.33 (0.70-2.52, p=0.381)  |
| 2                                                                                                                                                                                                                      | 193 (29.3) | 1.47 (0.91-2.36, p=0.117) | 1.22 (0.56-2.66, p=0.621)  |
| Number in dataframe = 659, Number in model = 659, Missing = 0, Number of events = 112, Concordance = 0.699 (SE = 0.028), R-squared = 0.085 (Max possible = 0.854), Likelihood ratio test = 58.506 (df = 13, p = 0.000) |            |                           |                            |

---

All-cause mortality, NAS scoring

---

**all HR (univariable)**

**HR (multivariable)**

---

*Histological diagnosis of NASH, number (%)*

|     |            |                           |                           |
|-----|------------|---------------------------|---------------------------|
| no  | 305 (46.3) | -                         | -                         |
| yes | 354 (53.7) | 1.24 (0.85-1.82, p=0.270) | 0.68 (0.36-1.29, p=0.240) |

---

Number in dataframe = 659, Number in model = 659, Missing = 0, Number of events = 112, Concordance = 0.699 (SE = 0.028), R-squared = 0.085 (Max possible = 0.854), Likelihood ratio test = 58.506 (df = 13, p = 0.000)

---

Supplementary Table 8

| Hepatic decompensation events                                                                       |                |                                                              |                                                           |
|-----------------------------------------------------------------------------------------------------|----------------|--------------------------------------------------------------|-----------------------------------------------------------|
|                                                                                                     |                | <b>Cause-specific HR<br/>all (multivariable)<sup>1</sup></b> | <b>Subdistribution HR<br/>(multivariable)<sup>2</sup></b> |
| <i>Age at biopsy</i>                                                                                |                |                                                              |                                                           |
| Mean<br>(SD)                                                                                        | 51.2<br>(13.7) | 1.01 (0.99-1.03, p=0.315)                                    | 1.00 (0.99-1.02, p=0.711)                                 |
| <i>Gender, number (%)</i>                                                                           |                |                                                              |                                                           |
| F                                                                                                   | 256 (44.0)     | -                                                            | -                                                         |
| M                                                                                                   | 326 (56.0)     | 0.69 (0.46-1.05, p=0.080)                                    | 0.64 (0.42-0.97, p=0.037)                                 |
| <i>NASH-CRN fibrosis stage, number (%)</i>                                                          |                |                                                              |                                                           |
| 0                                                                                                   | 188 (32.3)     | -                                                            | NA                                                        |
| 1                                                                                                   | 136 (23.4)     | 1.08 (0.55-2.12, p=0.815)                                    | 1.09 (0.56-2.11, p=0.804)                                 |
| 2                                                                                                   | 91 (15.6)      | 1.35 (0.66-2.76, p=0.415)                                    | 1.32 (0.65-2.71, p=0.442)                                 |
| 3                                                                                                   | 98 (16.8)      | 2.63 (1.42-4.87, p=0.002)                                    | 2.54 (1.35-4.76, p=0.004)                                 |
| 4                                                                                                   | 69 (11.9)      | 6.99 (3.87-12.61, p<0.001)                                   | 6.86 (3.71-12.68, p<0.001)                                |
| <sup>1</sup> Concordance = 0.741 (SE = 0.025), Likelihood ratio test = 74.546 (df = 6, p = <0.0001) |                |                                                              |                                                           |
| <sup>2</sup> Concordance = 0.733 (SE = 0.026), Likelihood ratio test = 70.54 (df = 6, p = <0.0001)  |                |                                                              |                                                           |
| Number in dataframe = 582, Number in model = 582, Missing = 0, Number of events = 106               |                |                                                              |                                                           |



Supplementary Table 9

| Biopsy cases for hepatic decompensation modelling |                       |        |                |                                                               |                                |                           |
|---------------------------------------------------|-----------------------|--------|----------------|---------------------------------------------------------------|--------------------------------|---------------------------|
| NASH-CRN fibrosis stage                           | Decompensation status | Gender | RNAseq success | Post-biopsy period to event/censoring (median days $\pm$ IQR) | Age at biopsy (years $\pm$ SD) | Number of cases (percent) |
| 0                                                 | 0                     | F      | No             | 3024 $\pm$ 3366                                               | 52.46 $\pm$ 13.44              | 13 (2.23)                 |
| 0                                                 | 0                     | F      | Yes            | 2586 $\pm$ 3471                                               | 51.78 $\pm$ 11.12              | 55 (9.45)                 |
| 0                                                 | 0                     | M      | No             | 3128 $\pm$ 3817                                               | 39.22 $\pm$ 14.11              | 23 (3.95)                 |
| 0                                                 | 0                     | M      | Yes            | 2572 $\pm$ 2904.75                                            | 44.79 $\pm$ 12.87              | 76 (13.06)                |
| 0                                                 | 1                     | F      | No             | 2715 $\pm$ 596                                                | 35.5 $\pm$ 14.85               | 2 (0.34)                  |
| 0                                                 | 1                     | F      | Yes            | 834.5 $\pm$ 794.5                                             | 55.9 $\pm$ 15.59               | 10 (1.72)                 |
| 0                                                 | 1                     | M      | No             | 1324.5 $\pm$ 1499.5                                           | 53.25 $\pm$ 9.91               | 4 (0.69)                  |
| 0                                                 | 1                     | M      | Yes            | 370 $\pm$ 525                                                 | 44.4 $\pm$ 15.19               | 5 (0.86)                  |
| 1                                                 | 0                     | F      | No             | 2835 $\pm$ 1227                                               | 57.77 $\pm$ 10.98              | 13 (2.23)                 |
| 1                                                 | 0                     | F      | Yes            | 1765.5 $\pm$ 1443.5                                           | 56.19 $\pm$ 12.19              | 26 (4.47)                 |
| 1                                                 | 0                     | M      | No             | 2659 $\pm$ 2019                                               | 40.27 $\pm$ 16.07              | 15 (2.58)                 |
| 1                                                 | 0                     | M      | Yes            | 2379 $\pm$ 3009                                               | 45.66 $\pm$ 12.43              | 67 (11.51)                |
| 1                                                 | 1                     | F      | No             | 1523 $\pm$ 2856                                               | 49.8 $\pm$ 7.92                | 5 (0.86)                  |

Biopsy cases for hepatic decompensation modelling

| <b>NASH-CRN fibrosis stage</b> | <b>Decompensation status</b> | <b>Gender</b> | <b>RNAseq success</b> | <b>Post-biopsy period to event/censoring (median days <math>\pm</math> IQR)</b> | <b>Age at biopsy (years <math>\pm</math> SD)</b> | <b>Number of cases (percent)</b> |
|--------------------------------|------------------------------|---------------|-----------------------|---------------------------------------------------------------------------------|--------------------------------------------------|----------------------------------|
| 1                              | 1                            | F             | Yes                   | 2088.5 $\pm$ 1202                                                               | 52.75 $\pm$ 9.18                                 | 4 (0.69)                         |
| 1                              | 1                            | M             | Yes                   | 3490.5 $\pm$ 1979.75                                                            | 49.5 $\pm$ 13.34                                 | 6 (1.03)                         |
| 2                              | 0                            | F             | No                    | 3486 $\pm$ 1771                                                                 | 60 $\pm$ 1.41                                    | 2 (0.34)                         |
| 2                              | 0                            | F             | Yes                   | 2664.5 $\pm$ 3093.25                                                            | 54.75 $\pm$ 12.01                                | 24 (4.12)                        |
| 2                              | 0                            | M             | No                    | 3570 $\pm$ 1358.25                                                              | 44 $\pm$ 10.35                                   | 10 (1.72)                        |
| 2                              | 0                            | M             | Yes                   | 1833 $\pm$ 1433.5                                                               | 50 $\pm$ 14.11                                   | 43 (7.39)                        |
| 2                              | 1                            | F             | No                    | 289 $\pm$ 0                                                                     | 63 $\pm$ NA                                      | 1 (0.17)                         |
| 2                              | 1                            | F             | Yes                   | 373 $\pm$ 1483.5                                                                | 61.57 $\pm$ 16.85                                | 7 (1.2)                          |
| 2                              | 1                            | M             | Yes                   | 414.5 $\pm$ 286.75                                                              | 61 $\pm$ 11.22                                   | 4 (0.69)                         |
| 3                              | 0                            | F             | No                    | 3316 $\pm$ 3197                                                                 | 55.67 $\pm$ 9.97                                 | 6 (1.03)                         |
| 3                              | 0                            | F             | Yes                   | 1766 $\pm$ 1678                                                                 | 58.46 $\pm$ 12.29                                | 41 (7.04)                        |
| 3                              | 0                            | M             | No                    | 2590 $\pm$ 2424.5                                                               | 47.33 $\pm$ 23.59                                | 3 (0.52)                         |
| 3                              | 0                            | M             | Yes                   | 1627 $\pm$ 1188                                                                 | 56 $\pm$ 12.75                                   | 25 (4.3)                         |
| 3                              | 1                            | F             | No                    | 743.5 $\pm$ 648.75                                                              | 51 $\pm$ 12.52                                   | 4 (0.69)                         |

Biopsy cases for hepatic decompensation modelling

| <b>NASH-CRN fibrosis stage</b> | <b>Decompensation status</b> | <b>Gender</b> | <b>RNAseq success</b> | <b>Post-biopsy period to event/censoring (median days <math>\pm</math> IQR)</b> | <b>Age at biopsy (years <math>\pm</math> SD)</b> | <b>Number of cases (percent)</b> |
|--------------------------------|------------------------------|---------------|-----------------------|---------------------------------------------------------------------------------|--------------------------------------------------|----------------------------------|
| 3                              | 1                            | F             | Yes                   | 810 $\pm$ 2345                                                                  | 56.55 $\pm$ 13.92                                | 11 (1.89)                        |
| 3                              | 1                            | M             | No                    | 244 $\pm$ 0                                                                     | 59 $\pm$ NA                                      | 1 (0.17)                         |
| 3                              | 1                            | M             | Yes                   | 1037 $\pm$ 1050.5                                                               | 53.29 $\pm$ 11.97                                | 7 (1.2)                          |
| 4                              | 0                            | F             | No                    | 994 $\pm$ 0                                                                     | 48 $\pm$ NA                                      | 1 (0.17)                         |
| 4                              | 0                            | F             | Yes                   | 2272 $\pm$ 1606.75                                                              | 64.5 $\pm$ 7.14                                  | 12 (2.06)                        |
| 4                              | 0                            | M             | No                    | 1024 $\pm$ 0                                                                    | 65 $\pm$ NA                                      | 1 (0.17)                         |
| 4                              | 0                            | M             | Yes                   | 1086 $\pm$ 737.5                                                                | 55.15 $\pm$ 11.22                                | 20 (3.44)                        |
| 4                              | 1                            | F             | No                    | 649 $\pm$ 1179                                                                  | 61.67 $\pm$ 9.11                                 | 6 (1.03)                         |
| 4                              | 1                            | F             | Yes                   | 821 $\pm$ 1161                                                                  | 57.77 $\pm$ 11.83                                | 13 (2.23)                        |
| 4                              | 1                            | M             | No                    | 332 $\pm$ 923.5                                                                 | 61 $\pm$ 8.83                                    | 4 (0.69)                         |
| 4                              | 1                            | M             | Yes                   | 727.5 $\pm$ 1029.25                                                             | 53.5 $\pm$ 11.29                                 | 12 (2.06)                        |

Supplementary Table 10

| Hepatic decompensation events, NAS scoring                                                                                                                                                                             |            |                            |                            |
|------------------------------------------------------------------------------------------------------------------------------------------------------------------------------------------------------------------------|------------|----------------------------|----------------------------|
|                                                                                                                                                                                                                        |            | all HR (univariable)       | HR (multivariable)         |
| <i>NASH-CRN fibrosis, number (%)</i>                                                                                                                                                                                   |            |                            |                            |
| 0                                                                                                                                                                                                                      | 188 (32.3) | -                          | -                          |
| 1                                                                                                                                                                                                                      | 136 (23.4) | 1.06 (0.54-2.05, p=0.873)  | 1.14 (0.57-2.26, p=0.717)  |
| 2                                                                                                                                                                                                                      | 91 (15.6)  | 1.38 (0.68-2.82, p=0.372)  | 1.39 (0.65-3.00, p=0.397)  |
| 3                                                                                                                                                                                                                      | 98 (16.8)  | 3.08 (1.69-5.62, p<0.001)  | 3.04 (1.49-6.17, p=0.002)  |
| 4                                                                                                                                                                                                                      | 69 (11.9)  | 8.14 (4.67-14.17, p<0.001) | 7.35 (3.87-13.96, p<0.001) |
| <i>NAS lobular inflammation, number (%)</i>                                                                                                                                                                            |            |                            |                            |
| 0                                                                                                                                                                                                                      | 85 (14.6)  | -                          | -                          |
| 1                                                                                                                                                                                                                      | 271 (46.6) | 1.30 (0.73-2.32, p=0.376)  | 0.82 (0.42-1.63, p=0.574)  |
| 2                                                                                                                                                                                                                      | 194 (33.3) | 1.47 (0.80-2.70, p=0.219)  | 0.60 (0.27-1.37, p=0.228)  |
| 3                                                                                                                                                                                                                      | 32 (5.5)   | 1.03 (0.34-3.13, p=0.955)  | 0.48 (0.14-1.68, p=0.251)  |
| <i>NAS steatosis, number (%)</i>                                                                                                                                                                                       |            |                            |                            |
| 0                                                                                                                                                                                                                      | 22 (3.8)   | -                          | -                          |
| 1                                                                                                                                                                                                                      | 212 (36.4) | 0.67 (0.28-1.60, p=0.370)  | 0.65 (0.25-1.66, p=0.367)  |
| 2                                                                                                                                                                                                                      | 215 (36.9) | 0.68 (0.29-1.62, p=0.388)  | 0.65 (0.24-1.76, p=0.400)  |
| 3                                                                                                                                                                                                                      | 133 (22.9) | 0.55 (0.22-1.37, p=0.201)  | 0.52 (0.18-1.48, p=0.221)  |
| <i>NAS hepatocyte ballooning, number (%)</i>                                                                                                                                                                           |            |                            |                            |
| 0                                                                                                                                                                                                                      | 224 (38.5) | -                          | -                          |
| 1                                                                                                                                                                                                                      | 191 (32.8) | 1.31 (0.80-2.15, p=0.280)  | 1.37 (0.67-2.77, p=0.385)  |
| 2                                                                                                                                                                                                                      | 167 (28.7) | 2.72 (1.70-4.35, p<0.001)  | 2.14 (0.94-4.91, p=0.071)  |
| Number in dataframe = 659, Number in model = 659, Missing = 0, Number of events = 112, Concordance = 0.699 (SE = 0.028), R-squared = 0.085 (Max possible = 0.854), Likelihood ratio test = 58.506 (df = 13, p = 0.000) |            |                            |                            |

---

## Hepatic decompensation events, NAS scoring

---

**all HR (univariable)**

**HR (multivariable)**

---

*Histological diagnosis of NASH, number (%)*

|     |            |                           |                           |
|-----|------------|---------------------------|---------------------------|
| no  | 276 (47.4) | -                         | -                         |
| yes | 306 (52.6) | 1.69 (1.14-2.51, p=0.009) | 0.87 (0.44-1.70, p=0.678) |

---

Number in dataframe = 659, Number in model = 659, Missing = 0, Number of events = 112, Concordance = 0.699 (SE = 0.028), R-squared = 0.085 (Max possible = 0.854), Likelihood ratio test = 58.506 (df = 13, p = 0.000)

---

Supplementary Table 11

| Genotype by fibrosis stage               |                         |             |            |             |            |
|------------------------------------------|-------------------------|-------------|------------|-------------|------------|
|                                          | NASH-CRN fibrosis stage |             |            |             |            |
|                                          | 0                       | 1           | 2          | 3           | 4          |
| <i>PNPLA3 (rs738409), number (%)</i>     |                         |             |            |             |            |
| G/G                                      | 25 (3.74)               | 21 (3.14)   | 14 (2.1)   | 22 (3.29)   | 21 (3.14)  |
| C/G                                      | 48 (7.19)               | 33 (4.94)   | 28 (4.19)  | 29 (4.34)   | 32 (4.79)  |
| C/C                                      | 94 (14.07)              | 78 (11.68)  | 55 (8.23)  | 56 (8.38)   | 52 (7.78)  |
| C/T                                      | 2 (0.3)                 | 3 (0.45)    | 0 (0)      | 1 (0.15)    | 0 (0)      |
| Not called                               | 6 (0.9)                 | 6 (0.9)     | 8 (1.2)    | 16 (2.4)    | 18 (2.69)  |
| <i>HSD17B13 (rs72613567), number (%)</i> |                         |             |            |             |            |
| T/T                                      | 4 (0.6)                 | 2 (0.3)     | 5 (0.75)   | 1 (0.15)    | 1 (0.15)   |
| T/TA                                     | 25 (3.74)               | 15 (2.25)   | 12 (1.8)   | 11 (1.65)   | 10 (1.5)   |
| TA/TA                                    | 37 (5.54)               | 35 (5.24)   | 23 (3.44)  | 15 (2.25)   | 19 (2.84)  |
| Not called                               | 109 (16.32)             | 89 (13.32)  | 65 (9.73)  | 97 (14.52)  | 93 (13.92) |
| <i>TM6SF2 (rs58542926), number (%)</i>   |                         |             |            |             |            |
| C/C                                      | 127 (19.01)             | 105 (15.72) | 68 (10.18) | 78 (11.68)  | 69 (10.33) |
| C/T                                      | 8 (1.2)                 | 8 (1.2)     | 2 (0.3)    | 4 (0.6)     | 3 (0.45)   |
| T/T                                      | 5 (0.75)                | 3 (0.45)    | 1 (0.15)   | 3 (0.45)    | 5 (0.75)   |
| Not called                               | 35 (5.24)               | 25 (3.74)   | 34 (5.09)  | 39 (5.84)   | 46 (6.89)  |
| <i>MBOAT7 (rs641738), number (%)</i>     |                         |             |            |             |            |
| C/C                                      | 8 (1.2)                 | 6 (0.9)     | 6 (0.9)    | 10 (1.5)    | 10 (1.5)   |
| T/T                                      | 10 (1.5)                | 17 (2.54)   | 11 (1.65)  | 11 (1.65)   | 23 (3.44)  |
| T/C                                      | 0 (0)                   | 1 (0.15)    | 0 (0)      | 2 (0.3)     | 1 (0.15)   |
| Not called                               | 157 (23.5)              | 117 (17.51) | 88 (13.17) | 101 (15.12) | 89 (13.32) |
